# Supplementary material for: Inhibitor treatment of peripheral mononuclear cells from Parkinson’s disease patients further validates LRRK2 dephosphorylation as a pharmacodynamic biomarker
Source: PubMed Central journal article supplement (PMC4977566; doi:10.1038/srep31391), 2016-08-09
Supplement: srep31391-s1.pdf [file srep31391-s1.pdf]

**Inhibitor treatment of peripheral mononuclear cells from Parkinson's disease patients further validates LRRK2 dephosphorylation as a pharmacodynamic biomarker.**

Perera G<sup>1</sup>, Ranola M<sup>2</sup>, Rowe D.B<sup>2</sup>, Halliday G.M<sup>1,3</sup>, Dzamko N<sup>1,3\*</sup>

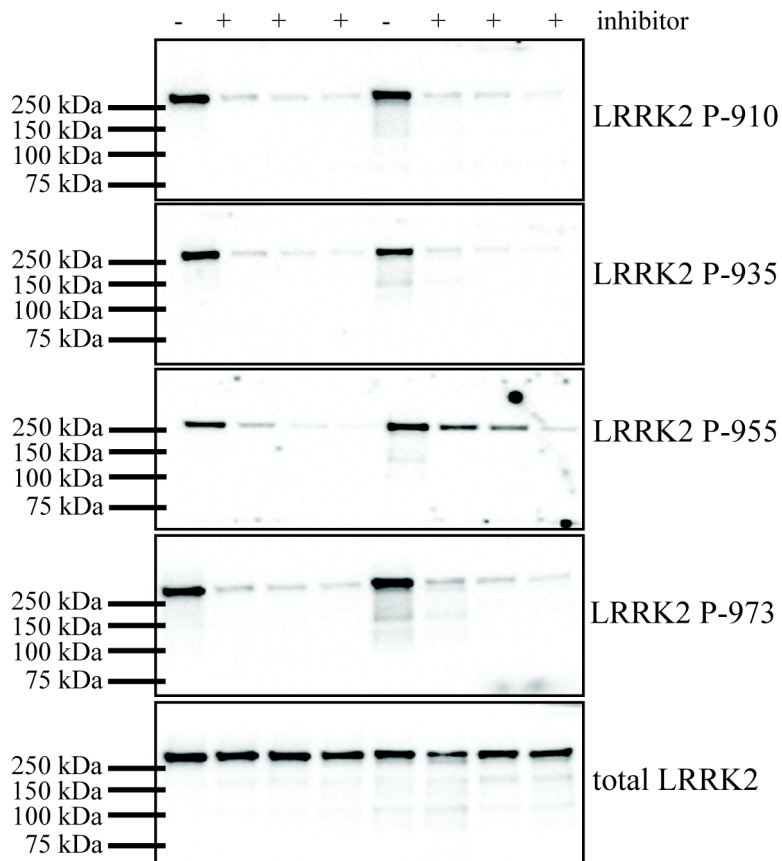

**Supplementary Figure 1**

**Supplementary Figure 1. Immunoblots showing antibody specificity.** Example full western blots from two subjects treated +/- GSK2578215A as used to generate data for figure 3. The antibodies, which have been well validated in knockout cells, detect a single band at the correct size of LRRK2. Note that membranes were cut at below the 75 kDa marker for simultaneous immunoblot detection of beta-actin at 50 kDa.

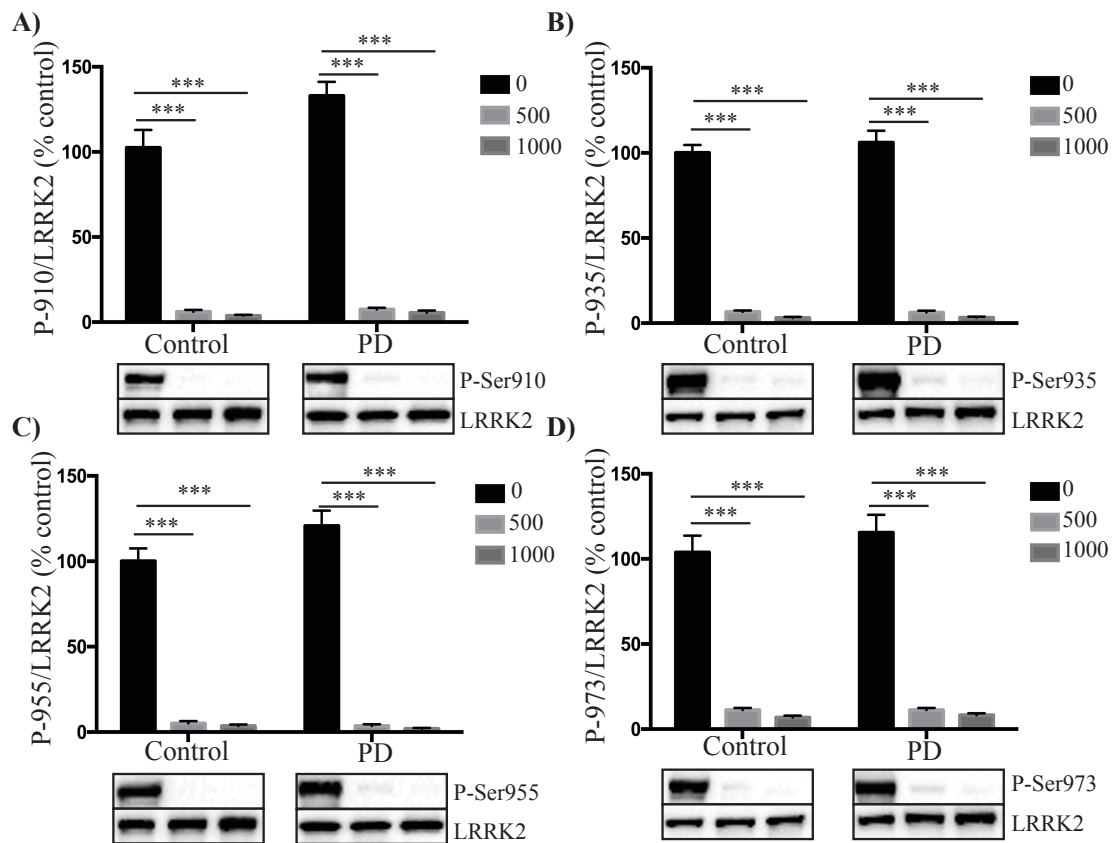

Supplementary Figure 2

**Supplementary Figure 2. The effect of higher concentrations of LRRK2-IN1 on LRRK2 dephosphorylation in control and PD patient PBMCs.** PBMCs isolated from control and PD patients were treated with either 0.5  $\mu$ M or 1  $\mu$ M LRRK2-IN1 for 1 h. Resulting cell lysates were immunoblotted for LRRK2 and LRRK2 phosphorylated at Ser910 (A), Ser935 (B), Ser955 (C) and Ser973 (D). Following quantitation, phosphorylated LRRK2 was normalized to total LRRK2 and results expressed as the percentage reduction in phosphorylation compared to the non-inhibitor treated control group. Two-way ANOVA with Tukey's post hoc test was used to determine any significant effects, defined as  $p < 0.05$ , of inhibitor or disease status on levels of phosphorylation. Data are mean  $\pm$  SEM. \*\*\* =  $p < 0.001$ , \*\* =  $p < 0.01$ . Representative immunoblots are shown. Sample size is 13 control and 15 PD patients.

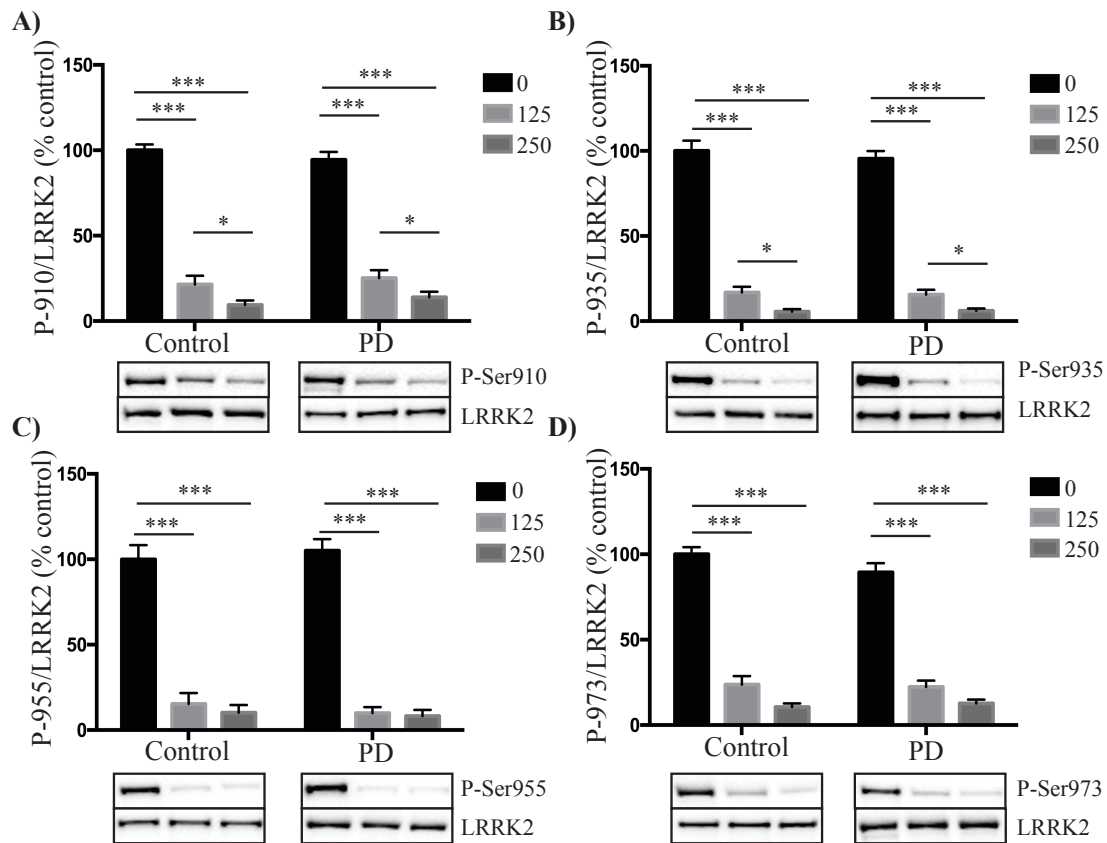

**Supplementary Figure 3**

**Supplementary Figure 3. The effect of lower concentrations of LRRK2-IN1 on LRRK2 dephosphorylation in control and PD patient PBMCs.** PBMCs isolated from control and PD patients were treated with either 0.5  $\mu$ M or 1  $\mu$ M LRRK2-IN1 for 1 h. Resulting cell lysates were immunoblotted for LRRK2 and LRRK2 phosphorylated at Ser910 (A), Ser935 (B), Ser955 (C) and Ser973 (D). Following quantitation, phosphorylated LRRK2 was normalized to total LRRK2 and results expressed as the percentage reduction in phosphorylation compared to the non-inhibitor treated control group. Two-way ANOVA with Tukey's post hoc test was used to determine any significant effects, defined as  $p < 0.05$ , of inhibitor or disease status on levels of phosphorylation. Data are mean  $\pm$  SEM. \*\*\* =  $p < 0.001$ , \*\* =  $p < 0.01$ , \* =  $p < 0.05$ . Representative immunoblots are shown. Sample size is 12 control and 12 PD patients.
